# Supplementary material for: Drosophila poised enhancers are generated during tissue patterning with the help of repression
Source: HighWire-hosted journal article supplement (doi:10.1101/gr.209486.116), 2016-11-14
Supplement: Supplemental_Table_S1.xlsx [file Supplemental_Table_S1.xlsx]

## Sheet: description
Column	Description
enhancer_name	Name of known enhancer
target_gene_name	Name of enhancer's target gene (if known)
enhancer_type	Tissue where enhancer is active
classification	Location of enhancer (TSS, Intergenic or Intragenic)
chr	dm3 reference chromosome
start	dm3 start coordinate
end	dm3 end coordinate
reference	Reference where enhancer was characterized
H3K27ac_gd7_enrichment	Normalized ChIP enrichment over input for a 1kb window centered on the enhancer
H3K27ac_Toll10b_enrichment	Normalized ChIP enrichment over input for a 1kb window centered on the enhancer
H3K27me3_gd7_enrichment	Normalized ChIP enrichment over input for a 1kb window centered on the enhancer
H3K27me3_Toll10b_enrichment	Normalized ChIP enrichment over input for a 1kb window centered on the enhancer
H3K4me1_gd7_enrichment	Normalized ChIP enrichment over input for a 1kb window centered on the enhancer
H3K4me1_Toll10b_enrichment	Normalized ChIP enrichment over input for a 1kb window centered on the enhancer
dl_Toll10b_enrichment	Normalized ChIP enrichment over input for a 201bp window centered on the transcription factor's summit within the enhancer
mad_gd7_enrichment	Normalized ChIP enrichment over input for a 201bp window centered on the transcription factor's summit within the enhancer
twi_Toll10b_enrichment	Normalized ChIP enrichment over input for a 201bp window centered on the transcription factor's summit within the enhancer
zen_gd7_enrichment	Normalized ChIP enrichment over input for a 201bp window centered on the transcription factor's summit within the enhancer
FPKM_gd7	RNA-seq FPKM in gd7 for the target gene (via cufflinks/cuffdiff)
FPKM_Toll10b	RNA-seq FPKM in Toll10b for the target gene (via cufflinks/cuffdiff)
DifferentialExpression	Whether target gene is considered differentially expressed by cuffdiff
H3K27me3_classification	Whether H3K27me3 ChIP enrichment exceeds 2-fold in either tissue
PRE_distance	Distance to nearest PRE in bp
PRE_peak_name	Name of nearest PRE peak in Supplemental Table S2
DHS_score_stage_5	Enhancer's average DNaseI Hypersensitivity score in Stage 5
DHS_score_stage_9	Enhancer's average DNaseI Hypersensitivity score in Stage 9
DHS_score_stage_10	Enhancer's average DNaseI Hypersensitivity score in Stage 10
DHS_score_stage_11	Enhancer's average DNaseI Hypersensitivity score in Stage 11
DHS_score_stage_14	Enhancer's average DNaseI Hypersensitivity score in Stage 14

## Sheet: enhancer_spreadsheet
enhancer_name	target_gene_name	enhancer_type	classification	chr	start	end	reference	H3K27ac_gd7_enrichment	H3K27ac_Toll10b_enrichment	H3K27me3_gd7_enrichment	H3K27me3_Toll10b_enrichment	H3K4me1_gd7_enrichment	H3K4me1_Toll10b_enrichment	dl_Toll10b_enrichment	mad_gd7_enrichment	twi_Toll10b_enrichment	zen_gd7_enrichment	FPKM_gd7	FPKM_Toll10b	DifferentialExpression	H3K27me3_classification	PRE_distance	PRE_peak_name	DHS_score_stage_5	DHS_score_stage_9	DHS_score_stage_10	DHS_score_stage_11	DHS_score_stage_14
Ady43A_Markstein	Ady43A	mesoderm	TSS	chr2R	3133869	3134085	Markstein et al. (2004)	0.8	1.96	0.51	0.43	1.27	0.74	2.86	1.3	1.69	0.6	0.69	1.72	Not differential	Low	171851	PRE_peak_96	0.21	0.12	0.08	0.24	0.53
Ance_Rusch	Ance	dorsal ectoderm	TSS	chr2L	13904733	13905265	Rusch and Levine (1997)	12.24	10.9	0.43	0.18	3.93	2.62	2.52	10.6	12.35	21.57	93.94	36.15	Higher in gd7	Low	505032	PRE_peak_62	1.26	1.49	1.83	1.03	0.44
apt_Ozdemir	apt	mesoderm	Intragenic	chr2R	19460067	19462066	Ozdemir et al. (2011)	0.85	2.24	0.77	1.37	2.1	1.74	2.2	5.45	33.15	4.92	69.54	64.09	Not differential	Low	46786	PRE_peak_170	2.53	2.7	2.17	1.23	0.69
Asph_Ozdemir	Asph	mesoderm	TSS	chr2R	11997142	11999642	Ozdemir et al. (2011)	3.38	14.25	0.29	0.19	3.02	3.8	9.18	5.45	45.76	8.72	11.87	146.94	Higher in Toll10b	Low	274375	PRE_peak_147	1.21	1.24	1.25	0.72	0.43
BobA_Ozdemir	Unknown	mesoderm	Intergenic	chr3L	14945343	14947303	Ozdemir et al. (2011)	2.7	4.76	0.84	1.06	1.91	1.73	5.94	2.67	41.31	2.25				Low	89695	PRE_peak_246	1.02	1.53	1.1	0.37	0.32
C15_650_Lin	C15	dorsal ectoderm	Intragenic	chr3R	17331786	17332437	Lin et al. (2006)	1.37	0.5	2.46	9.45	2.01	1.08	1.22	14.7	0.86	23.39	11.59	0	Higher in gd7	Low	6109	PRE_peak_418	1.36	1.35	1.36	0.65	0.3
cact_Sandmann	cact	mesoderm	Intragenic	chr2L	16319411	16320423	Sandmann et al. (2007)	1.12	8.78	0.26	0.18	1.8	3.76	11.28	1.2	55.98	0.76	285.36	573.88	Higher in Toll10b	Low	102147	PRE_peak_68	0.78	0.95	0.48	0.3	0.31
CG4221_Sandmann	CG4221	mesoderm	TSS	chr3R	11746513	11748343	Sandmann et al. (2007)	4.13	13.36	0.58	0.35	2.63	4.67	3.58	7.72	65.48	16.09	5.67	47.52	Higher in Toll10b	Low	66576	PRE_peak_348	2.06	1.91	2.03	1.24	0.63
CG8788_Sandmann	CG8788	mesoderm	TSS	chr2R	5025946	5026574	Sandmann et al. (2007)	4.04	7.97	0.22	0.12	2.8	2.19	3.78	4.67	55.5	4.14	87.13	86.25	Not differential	Low	803815	PRE_peak_103	2.68	3.24	2.44	1.96	0.78
Cnx99A_Ozdemir	Unknown	mesoderm	Intergenic	chr3R	25134141	25135377	Ozdemir et al. (2011)	1.54	6.98	1.11	0.89	2.22	1.64	8.43	2.75	89.67	1.5				Low	246373	PRE_peak_442	1.16	1.35	0.68	0.93	0.43
Cyp310a1_Ozdemir	Cyp310a1	mesoderm	TSS	chr2L	18652293	18653292	Ozdemir et al. (2011)	0.73	15.47	0.87	0.43	1.16	4.31	14.96	1.68	107.03	1.49	0.55	258.2	Not differential	Low	53765	PRE_peak_75	1.57	1.11	0.55	0.38	0.37
dpp_Huang	dpp	dorsal ectoderm	Intragenic	chr2L	2455866	2457725	Huang et al. (1993)	5.25	2.31	2.91	7.33	3.58	2.33	23.31	24.47	12.37	41.46	18.74	3.01	Higher in gd7	Low	714	PRE_peak_24	2.5	1.4	0.75	0.29	0.4
Dscam_Ozdemir	Unknown	mesoderm	TSS	chr2R	3268100	3268475	Ozdemir et al. (2011)	4	2.99	0.61	1.33	2.69	2.49	22.16	5.54	127.93	5.61				Low	37461	PRE_peak_96	4.02	3.68	2.51	1.49	0.81
Dtg_Hodar	Dtg	dorsal ectoderm	TSS	chr3R	8473379	8473902	Hodar et al. (2014)	3.4	4.74	0.52	0.93	2.65	3.28	4.51	4.89	16.65	6.5	246.6	115.37	Higher in gd7	Low	366417	PRE_peak_338	2.86	2.99	2.74	3.24	1.64
emc_Ozdemir	Unknown	mesoderm	TSS	chr3L	742059	743659	Ozdemir et al. (2011)	4.81	9.52	0.57	1.44	1.69	1.63	15.16	1.02	76.35	3.75				Low	25777	PRE_peak_185	0.9	1.04	0.67	0.66	0.44
htl_Stathopoulos	htl	mesoderm	TSS	chr3R	13875600	13876391	Stathopoulos et al. (2004)	1.52	7.13	1.77	0.79	1.32	2.3	4.12	2.18	45.59	1.97	0.8	79.72	Higher in Toll10b	Low	12581	PRE_peak_405	1.73	1.86	1.37	1.19	0.59
Ilp4_Stathopoulos	Ilp4	mesoderm	TSS	chr3L	9797449	9797743	Stathopoulos et al. (2002)	1.65	8.12	0.87	0.45	1.71	2.21	7.93	3.41	16.54	8.81	26.62	1968.19	Higher in Toll10b	Low	421360	PRE_peak_211	0.8	0.42	0.53	0.27	0.29
Mdr49_Zeitlinger	Mdr49	mesoderm	TSS	chr2R	8833934	8834294	Zeitlinger et al. (2007)	1.39	5.39	1.8	2.76	2.06	3.83	5.33	3.87	12.28	3.83	2.88	222.56	Higher in Toll10b	Low	9049	PRE_peak_119	1.89	2.21	1.53	1.22	0.36
Mef2_Nguyen	Mef2	mesoderm	Intragenic	chr2R	5819214	5819493	Nguyen and Xu (1998)	0.49	5.83	1.09	0.78	0.7	2.03	6.52	0.3	74.77	0.76	7.36	52.38	Higher in Toll10b	Low	10896	PRE_peak_103	1.39	2.27	1.84	1.66	0.33
Mef2_Ozdemir	Mef2	mesoderm	TSS	chr2R	5847634	5848273	Ozdemir et al. (2011)	7.71	18.38	0.36	0.2	2.39	2.13	8.03	3.78	100.12	3.69	7.36	52.38	Higher in Toll10b	Low	16682	PRE_peak_104	2.32	2.52	1.64	1.09	0.59
mir-1_Biemar	mir-1	mesoderm	Intragenic	chr2L	20480577	20481741	Biemar et al. (2006)	0.68	3.8	0.9	0.39	0.63	1.62	5.44	0.57	84.81	3.51				Low	288623	PRE_peak_81	0.76	1.5	1.04	0.46	0.39
mir-1_Zeitlinger	mir-1	mesoderm	Intragenic	chr2L	20475806	20477901	Zeitlinger et al. (2007)	0.42	5.49	0.83	0.43	0.66	1.91	6.9	0.82	54.85	1.43				Low	292463	PRE_peak_81	0.33	0.67	0.72	1.01	0.6
Ocho_Ozdemir	Unknown	mesoderm	TSS	chr3L	14968341	14970091	Ozdemir et al. (2011)	4.03	14.37	0.8	1.28	2.9	9.52	21.82	4.9	105.17	4.41				Low	66907	PRE_peak_246	1.54	2.2	1.7	1.48	0.41
Phm_Markstein	Phm	mesoderm	TSS	chr2R	19875348	19875790	Markstein et al. (2004)	2.27	11.65	0.46	0.23	1.54	2.07	28.04	2.34	60.55	1.87	11.54	19.67	Not differential	Low	340537	PRE_peak_172	1.82	1.62	0.64	0.9	0.48
pnr_Zeitlinger	pnr	dorsal ectoderm	Intragenic	chr3R	11854234	11854784	Zeitlinger et al. (2007)	2.59	0.48	3.18	8.33	2.32	1.36	1.66	25.19	6.88	44.58	36.99	0.57	Higher in gd7	Low	2209	PRE_peak_350	2.35	1.91	0.58	0.28	0.38
pnt_Ozdemir	Unknown	mesoderm	Intragenic	chr3R	19169181	19170380	Ozdemir et al. (2011)	1.21	3.2	1.97	1.16	2.36	2.92	5.4	5.18	54.93	6.21				Low	47694	PRE_peak_432	2.29	2.83	2.27	1.98	0.32
sna_Ip	sna	mesoderm	TSS	chr2L	15478144	15481082	Ip et al. (1992b)	0.64	5.89	7.4	3.08	1.99	2.32	45.96	5.58	58.18	19.15	2.08	753.54	Higher in Toll10b	Low	144080	PRE_peak_67	1.24	1.18	0.99	1.07	0.46
sna-S_Perry	sna	mesoderm	TSS	chr2L	15485484	15486749	Perry et al. (2010)	0.55	4.78	5.31	3.65	1.76	2.22	36.1	4.36	148.21	11.34	2.08	753.54	Higher in Toll10b	Low	151420	PRE_peak_67	1.7	1.01	0.62	0.36	0.3
stumps_Sandmann	stumps	mesoderm	TSS	chr3R	10414437	10416493	Sandmann et al. (2007)	0.63	7.09	1.39	1.82	1.19	2.48	8.66	1.54	66.67	1.59	0.29	154.76	Higher in Toll10b	Low	686704	PRE_peak_347	0.64	1.32	0.9	0.91	0.4
T48_Sandmann	T48	mesoderm	TSS	chr3R	22707641	22709469	Sandmann et al. (2007)	1.49	5.11	0.43	0.73	1.76	3	3.03	3.15	40.8	5	3.26	17.14	Higher in Toll10b	Low	194	PRE_peak_436	0.7	0.7	0.77	0.56	0.37
tin_Yin	tin	mesoderm	Intragenic	chr3R	17205819	17205999	Yin et al. (1997)	0.35	4.72	13.53	11.18	1.42	2.71	6.17	1.32	43.37	2.21	0.17	100.83	Higher in Toll10b	Low	980	PRE_peak_411	1.92	2.41	1.95	0.65	0.44
tld_Kirov	tld	dorsal ectoderm	TSS	chr3R	20574728	20575524	Kirov et al. (1994)	1.51	0.8	0.54	1.13	2.59	2.05	6.19	7.42	11.08	32.39	52.75	2.44	Higher in gd7	Low	330687	PRE_peak_433	3.04	2.97	1.95	2.1	0.35
trbl_Sandmann	trbl	mesoderm	TSS	chr3L	20394270	20396658	Sandmann et al. (2007)	12.2	13.07	0.23	0.12	3.92	3.02	8.37	8.38	49.84	19.46	67.23	207.57	Higher in Toll10b	Low	216832	PRE_peak_254	2.86	2.69	2.47	1.73	0.68
tup_Zeitlinger	tup	dorsal ectoderm	Intragenic	chr2L	18875141	18875548	Zeitlinger et al. (2007)	2.77	1.03	1.43	8.39	5.05	1.47	2.5	32.91	20.08	38.39	35.8	1.14	Higher in gd7	Low	5564	PRE_peak_79	1.9	1.75	1.51	0.84	0.35
twi_Jiang	twi	mesoderm	TSS	chr2R	18932429	18933663	Jiang et al. (1991)	1.24	12.53	8.59	5.57	3.1	3.39	12.35	5.28	21.54	5.52	0.19	708.85	Higher in Toll10b	Low	0	PRE_peak_168	0.84	0.59	0.57	0.35	0.29
twi_Ozdemir	twi	mesoderm	Intergenic	chr2R	18936997	18938126	Ozdemir et al. (2011)	0.56	9.26	10.45	4.85	1.48	2.41	9.56	4.26	66.31	9.34	0.19	708.85	Higher in Toll10b	Low	0	PRE_peak_169	1.73	1.91	1.31	1.1	0.33
VT0984_Kvon	erm	dorsal ectoderm	Intragenic	chr2L	1958014	1960258	Kvon et al. (2012)	0.68	0.4	11.86	15.32	1.28	0.97	1.64	6.25	2.29	12.6	0.75	0.03	Higher in gd7	Low	0	PRE_peak_16	0.69	0.39	0.36	0.33	0.47
VT1404_Kvon	Unknown	dorsal ectoderm	TSS	chr2L	2752765	2754884	Kvon et al. (2012)	13.32	26.71	0.62	0.25	5.51	12.43	6.66	11.24	8.3	18.43				Low	297613	PRE_peak_24	2.62	2.59	2.76	2.24	1.38
VT15341_Kvon	Unknown	mesoderm	TSS	chr2R	7779541	7781099	Kvon et al. (2012)	10.8	19.43	0.97	0.4	3.82	6.22	4.98	8.84	27.61	18.82				Low	326084	PRE_peak_114	2.51	2.84	2.31	2.31	1.49
VT17873_Kvon	CG5522	mesoderm	TSS	chr2R	12671212	12673370	Kvon et al. (2012)	4.65	14.61	0.31	0.3	3.94	3.84	4.91	3.67	70.43	11.12	73.78	48.89	Higher in gd7	Low	199576	PRE_peak_149	1.8	2.36	2.38	1.15	0.49
VT20119_Kvon	ktub	mesoderm	TSS	chr2R	16988930	16989475	Kvon et al. (2012)	1.38	2.13	0.31	0.24	1.46	1.58	2.85	3.34	26.88	2.69	1.16	6.28	Higher in Toll10b	Low	139708	PRE_peak_162	2.82	2.81	2.5	2.13	0.82
VT21015_Kvon	Unknown	mesoderm	Intragenic	chr2R	18689548	18691090	Kvon et al. (2012)	3.23	13.37	0.23	0.15	2.55	3.56	7.13	6.83	71.88	11.31				Low	56305	PRE_peak_166	2.88	3.09	2.06	1.85	0.84
VT26325_Kvon	CG10479	dorsal ectoderm	TSS	chr3L	5976078	5978250	Kvon et al. (2012)	1.96	2.6	1.65	2.89	2.06	1.57	1.93	13.55	7.66	25.01	19.94	99.96	Higher in Toll10b	Low	100625	PRE_peak_199	0.63	0.91	0.64	0.51	0.36
VT34695_Kvon	Unknown	dorsal ectoderm	Intragenic	chr3L	22175053	22177267	Kvon et al. (2012)	1.6	0.95	0.91	1.36	2.25	0.93	1.77	7.55	1.75	15.5				Low	48827	PRE_peak_268	0.58	0.49	0.46	0.38	0.4
VT36350_Kvon	Unknown	dorsal ectoderm	Intragenic	chr3R	282570	284657	Kvon et al. (2012)	2.02	0.56	2.24	1.23	1.91	0.52	2.8	3.56	2.44	17.9				Low	109819	PRE_peak_271	0.53	0.3	0.21	0.31	0.42
VT37495_Kvon	zen2	dorsal ectoderm	Intragenic	chr3R	2548627	2550765	Kvon et al. (2012)	0.74	0.55	2.33	2.89	1.48	1.26	2.67	8.5	11.22	8.73	33.59	1.31	Higher in gd7	Low	16567	PRE_peak_279	0.81	0.8	0.67	0.45	0.45
VT42492_Kvon	tara	dorsal ectoderm	Intragenic	chr3R	12076924	12079107	Kvon et al. (2012)	9.48	20.41	0.12	0.34	3.13	3.25	3.23	11.39	14.37	35.7	5.09	9.19	Higher in Toll10b	Low	132312	PRE_peak_352	1.34	1.36	1.2	0.86	1.06
VT44117_Kvon	Dl	dorsal ectoderm	Intergenic	chr3R	15157311	15159508	Kvon et al. (2012)	3.43	9.65	0.8	0.44	2.74	3.35	1.65	15.49	38.09	27.46	68.57	83.24	Not differential	Low	407487	PRE_peak_408	1.05	1.39	1.08	0.38	0.35
VT44757_Kvon	Unknown	dorsal ectoderm	Intragenic	chr3R	16368758	16370878	Kvon et al. (2012)	4.42	1.68	0.63	0.43	3.44	1.7	5.02	9.46	6.11	12.19				Low	301591	PRE_peak_410	2.44	2.17	1.17	1.68	0.4
VT49279_Kvon	Unknown	dorsal ectoderm	Intergenic	chr3R	25088511	25090669	Kvon et al. (2012)	1.59	2.24	0.73	0.8	2.11	1.38	2.36	4.08	19.37	12.14				Low	291081	PRE_peak_442	1.77	1.76	0.97	1.2	0.38
VT56148_Kvon	N	mesoderm	Intragenic	chrX	3032372	3034558	Kvon et al. (2012)	6.87	7.27	0.21	0.56	5.25	5.38	2.56	5.13	12.59	14.63	26.05	32.41	Not differential	Low	703134	PRE_peak_498	0.98	1.07	0.87	0.82	0.46
VT57022_Kvon	Unknown	dorsal ectoderm	TSS	chrX	4833051	4835256	Kvon et al. (2012)	4.86	4.54	0.62	0.2	2.22	2.01	3.85	6.76	14.11	11.15				Low	321321	PRE_peak_515	1.66	1.79	1.28	1	0.65
VT6477_Kvon	pdm2	dorsal ectoderm	Intragenic	chr2L	12665181	12667293	Kvon et al. (2012)	1.79	1.09	1.85	4.73	2.08	1.53	3.71	15.76	11.48	18.31	14.56	17.93	Not differential	Low	10787	PRE_peak_61	1.02	1.04	0.6	0.26	0.3
VT7402_Kvon	noc	mesoderm	TSS	chr2L	14485084	14487223	Kvon et al. (2012)	0.88	3.33	2.79	4.1	1.61	1.42	7.96	8.25	36.52	11.69	13.7	85.4	Higher in Toll10b	Low	2763	PRE_peak_63	1.72	1.19	0.95	0.76	0.46
VT8889_Kvon	Lrch	mesoderm	TSS	chr2L	17381424	17383547	Kvon et al. (2012)	3.15	2.07	0.58	0.8	2.98	2.15	21.59	3.92	50.57	7.35	19.04	27.91	Not differential	Low	190991	PRE_peak_71	1.03	1.03	0.87	0.64	0.43
VT9677_Kvon	tup	dorsal ectoderm	TSS	chr2L	18893565	18895695	Kvon et al. (2012)	5.15	0.97	1.93	8.14	2.6	1.49	2.61	30.02	11	81.81	35.8	1.14	Higher in gd7	Low	11806	PRE_peak_79	1.48	1.23	0.89	0.54	0.42
wntD_Zeitlinger	wntD	mesoderm	TSS	chr3R	9118955	9119462	Zeitlinger et al. (2007)	0.54	1.68	1.67	0.55	1.63	1.82	15.1	4.44	38.77	6.13	0.52	58.06	Higher in Toll10b	Low	218264	PRE_peak_342	2.68	2.67	1.29	0.24	0.4
zen_dist_Doyle	zen	dorsal ectoderm	TSS	chr3R	2580742	2581377	Doyle et al. (1989)	7.26	1.81	1.34	2.64	3.58	1.43	25.08	7.46	40.51	14.68	125.65	19.88	Higher in gd7	Low	12687	PRE_peak_280	0.69	0.36	0.43	0.24	0.23
zen_prox_Doyle	zen	dorsal ectoderm	TSS	chr3R	2580211	2580586	Doyle et al. (1989)	2.46	1.65	1.52	3.64	1.9	1.68	3.81	15.23	8.32	29.63	125.65	19.88	Higher in gd7	Low	12156	PRE_peak_280	3.32	0.94	0.47	0.26	0.36
