# Supplementary material for: Drosophila poised enhancers are generated during tissue patterning with the help of repression
Source: HighWire-hosted journal article supplement (doi:10.1101/gr.209486.116), 2016-11-14
Supplement: Supplemental_Table_S2.xlsx [file Supplemental_Table_S2.xlsx]

## Sheet: pre_peaks
chr	start	end	name
chr2L	4997	5388	PRE_peak_1
chr2L	5480	6073	PRE_peak_2
chr2L	6571	6824	PRE_peak_3
chr2L	160538	161148	PRE_peak_4
chr2L	368702	369080	PRE_peak_5
chr2L	377619	378181	PRE_peak_6
chr2L	585298	585652	PRE_peak_7
chr2L	589766	590326	PRE_peak_8
chr2L	594552	595594	PRE_peak_9
chr2L	596952	597282	PRE_peak_10
chr2L	597773	598164	PRE_peak_11
chr2L	599539	599792	PRE_peak_12
chr2L	701363	702292	PRE_peak_13
chr2L	1954447	1955146	PRE_peak_14
chr2L	1958120	1958405	PRE_peak_15
chr2L	1958460	1958652	PRE_peak_16
chr2L	1970297	1971068	PRE_peak_17
chr2L	1971272	1971760	PRE_peak_18
chr2L	1972533	1973085	PRE_peak_19
chr2L	1973166	1973448	PRE_peak_20
chr2L	2448405	2448724	PRE_peak_21
chr2L	2449599	2449847	PRE_peak_22
chr2L	2449922	2450299	PRE_peak_23
chr2L	2454740	2455151	PRE_peak_24
chr2L	3538508	3540372	PRE_peak_25
chr2L	3580676	3581252	PRE_peak_26
chr2L	3606361	3607075	PRE_peak_27
chr2L	3657447	3657663	PRE_peak_28
chr2L	3657915	3658526	PRE_peak_29
chr2L	3662116	3662762	PRE_peak_30
chr2L	3825293	3825795	PRE_peak_31
chr2L	3827491	3827735	PRE_peak_32
chr2L	3835254	3835640	PRE_peak_33
chr2L	3836470	3836966	PRE_peak_34
chr2L	4810126	4810333	PRE_peak_35
chr2L	4811672	4811938	PRE_peak_36
chr2L	5403469	5404085	PRE_peak_37
chr2L	5461010	5461777	PRE_peak_38
chr2L	6178493	6178782	PRE_peak_39
chr2L	6536024	6536503	PRE_peak_40
chr2L	6545151	6545520	PRE_peak_41
chr2L	6546912	6547242	PRE_peak_42
chr2L	6821633	6822051	PRE_peak_43
chr2L	6833477	6834086	PRE_peak_44
chr2L	7306805	7307256	PRE_peak_45
chr2L	8825147	8825828	PRE_peak_46
chr2L	9581580	9582148	PRE_peak_47
chr2L	9607902	9608629	PRE_peak_48
chr2L	10353714	10354294	PRE_peak_49
chr2L	11358269	11358863	PRE_peak_50
chr2L	11445410	11446524	PRE_peak_51
chr2L	11447113	11447780	PRE_peak_52
chr2L	12003613	12004211	PRE_peak_53
chr2L	12006431	12006658	PRE_peak_54
chr2L	12007357	12007589	PRE_peak_55
chr2L	12010267	12010820	PRE_peak_56
chr2L	12010970	12011198	PRE_peak_57
chr2L	12085773	12086118	PRE_peak_58
chr2L	12613071	12613329	PRE_peak_59
chr2L	12617732	12618825	PRE_peak_60
chr2L	12678081	12678723	PRE_peak_61
chr2L	14410298	14410767	PRE_peak_62
chr2L	14489987	14491101	PRE_peak_63
chr2L	15108845	15109003	PRE_peak_64
chr2L	15109073	15109555	PRE_peak_65
chr2L	15111306	15111660	PRE_peak_66
chr2L	15333446	15334063	PRE_peak_67
chr2L	16422571	16423413	PRE_peak_68
chr2L	16485534	16486699	PRE_peak_69
chr2L	16486773	16487257	PRE_peak_70
chr2L	17574539	17574955	PRE_peak_71
chr2L	17735523	17736087	PRE_peak_72
chr2L	17743771	17744021	PRE_peak_73
chr2L	18596916	18597255	PRE_peak_74
chr2L	18598211	18598527	PRE_peak_75
chr2L	18737276	18737632	PRE_peak_76
chr2L	18782436	18784086	PRE_peak_77
chr2L	18795868	18796799	PRE_peak_78
chr2L	18881113	18881758	PRE_peak_79
chr2L	18936194	18936469	PRE_peak_80
chr2L	20770365	20770816	PRE_peak_81
chr2L	20774435	20774602	PRE_peak_82
chr2L	20776912	20777257	PRE_peak_83
chr2L	20783174	20783402	PRE_peak_84
chr2L	21789561	21789739	PRE_peak_85
chr2L	21827969	21828675	PRE_peak_86
chr2L	21846818	21847198	PRE_peak_87
chr2L	21847553	21847995	PRE_peak_88
chr2L	21851442	21851837	PRE_peak_89
chr2L	21866453	21866762	PRE_peak_90
chr2L	21868751	21869100	PRE_peak_91
chr2L	21869170	21869494	PRE_peak_92
chr2L	21899051	21899776	PRE_peak_93
chr2L	22024334	22024835	PRE_peak_94
chr2R	1614273	1614874	PRE_peak_95
chr2R	3305937	3306341	PRE_peak_96
chr2R	3306593	3307125	PRE_peak_97
chr2R	3906235	3906889	PRE_peak_98
chr2R	3911994	3912161	PRE_peak_99
chr2R	3916875	3917189	PRE_peak_100
chr2R	3918257	3918919	PRE_peak_101
chr2R	3938839	3939020	PRE_peak_102
chr2R	5830390	5830576	PRE_peak_103
chr2R	5864956	5865309	PRE_peak_104
chr2R	5866747	5867013	PRE_peak_105
chr2R	5875766	5876241	PRE_peak_106
chr2R	6126264	6126880	PRE_peak_107
chr2R	7356688	7357405	PRE_peak_108
chr2R	7359580	7359791	PRE_peak_109
chr2R	7362651	7363457	PRE_peak_110
chr2R	7415185	7416113	PRE_peak_111
chr2R	7416930	7417473	PRE_peak_112
chr2R	7429576	7429868	PRE_peak_113
chr2R	7453162	7453456	PRE_peak_114
chr2R	8771802	8772606	PRE_peak_115
chr2R	8774271	8774709	PRE_peak_116
chr2R	8791367	8792349	PRE_peak_117
chr2R	8792579	8792907	PRE_peak_118
chr2R	8843344	8843764	PRE_peak_119
chr2R	8844937	8845659	PRE_peak_120
chr2R	8845956	8846726	PRE_peak_121
chr2R	8847028	8847844	PRE_peak_122
chr2R	8859239	8859561	PRE_peak_123
chr2R	8866978	8867638	PRE_peak_124
chr2R	8867702	8869111	PRE_peak_125
chr2R	8871913	8872663	PRE_peak_126
chr2R	8872797	8873643	PRE_peak_127
chr2R	8876844	8877134	PRE_peak_128
chr2R	8878155	8878519	PRE_peak_129
chr2R	8878599	8878774	PRE_peak_130
chr2R	8879158	8879868	PRE_peak_131
chr2R	8883574	8884991	PRE_peak_132
chr2R	8902345	8902585	PRE_peak_133
chr2R	8906762	8907206	PRE_peak_134
chr2R	8922430	8923343	PRE_peak_135
chr2R	8926168	8926685	PRE_peak_136
chr2R	8927025	8927217	PRE_peak_137
chr2R	8929066	8929425	PRE_peak_138
chr2R	8929522	8930076	PRE_peak_139
chr2R	10095543	10095949	PRE_peak_140
chr2R	10343624	10343912	PRE_peak_141
chr2R	10345424	10346144	PRE_peak_142
chr2R	10365148	10365370	PRE_peak_143
chr2R	10686321	10687276	PRE_peak_144
chr2R	10687655	10688027	PRE_peak_145
chr2R	11216671	11217299	PRE_peak_146
chr2R	11722497	11722766	PRE_peak_147
chr2R	12402231	12402743	PRE_peak_148
chr2R	12471365	12471635	PRE_peak_149
chr2R	13644779	13644964	PRE_peak_150
chr2R	13709677	13710211	PRE_peak_151
chr2R	14245074	14245315	PRE_peak_152
chr2R	15162805	15163369	PRE_peak_153
chr2R	16790938	16791356	PRE_peak_154
chr2R	16794659	16795401	PRE_peak_155
chr2R	16800213	16800477	PRE_peak_156
chr2R	16801056	16802974	PRE_peak_157
chr2R	16803570	16804448	PRE_peak_158
chr2R	16807204	16807704	PRE_peak_159
chr2R	16822635	16823124	PRE_peak_160
chr2R	16839070	16839247	PRE_peak_161
chr2R	16848242	16849221	PRE_peak_162
chr2R	17948289	17948489	PRE_peak_163
chr2R	18129279	18129907	PRE_peak_164
chr2R	18129993	18130846	PRE_peak_165
chr2R	18747396	18748183	PRE_peak_166
chr2R	18754996	18755600	PRE_peak_167
chr2R	18933453	18933901	PRE_peak_168
chr2R	18937662	18937898	PRE_peak_169
chr2R	19508853	19509265	PRE_peak_170
chr2R	19519731	19520066	PRE_peak_171
chr2R	19534605	19534810	PRE_peak_172
chr2R	20699600	20699779	PRE_peak_173
chr2R	20700959	20701626	PRE_peak_174
chr2R	20701951	20702203	PRE_peak_175
chr2R	20732319	20732694	PRE_peak_176
chr2R	20939778	20940292	PRE_peak_177
chr2R	20949096	20949617	PRE_peak_178
chr2R	20987113	20987377	PRE_peak_179
chr2R	20987621	20988469	PRE_peak_180
chr2R	21102526	21103038	PRE_peak_181
chr3L	377203	377577	PRE_peak_182
chr3L	377799	378576	PRE_peak_183
chr3L	640447	640673	PRE_peak_184
chr3L	769437	769627	PRE_peak_185
chr3L	1177901	1178797	PRE_peak_186
chr3L	1364340	1364767	PRE_peak_187
chr3L	1919603	1920528	PRE_peak_188
chr3L	1920903	1921456	PRE_peak_189
chr3L	2466604	2466959	PRE_peak_190
chr3L	3624826	3625247	PRE_peak_191
chr3L	3625965	3626444	PRE_peak_192
chr3L	3846008	3846377	PRE_peak_193
chr3L	3878781	3879007	PRE_peak_194
chr3L	4159336	4159560	PRE_peak_195
chr3L	4842625	4842926	PRE_peak_196
chr3L	4976001	4976785	PRE_peak_197
chr3L	5874094	5874726	PRE_peak_198
chr3L	5874975	5875452	PRE_peak_199
chr3L	6782648	6783408	PRE_peak_200
chr3L	6838755	6839141	PRE_peak_201
chr3L	6896823	6897648	PRE_peak_202
chr3L	6899909	6900116	PRE_peak_203
chr3L	6982026	6982279	PRE_peak_204
chr3L	6982644	6982809	PRE_peak_205
chr3L	7940896	7941439	PRE_peak_206
chr3L	8997837	8998467	PRE_peak_207
chr3L	9012232	9012905	PRE_peak_208
chr3L	9034063	9034628	PRE_peak_209
chr3L	9035400	9035738	PRE_peak_210
chr3L	10219104	10219622	PRE_peak_211
chr3L	10281244	10281702	PRE_peak_212
chr3L	10282378	10282954	PRE_peak_213
chr3L	10283857	10284102	PRE_peak_214
chr3L	10299344	10299801	PRE_peak_215
chr3L	10301024	10301695	PRE_peak_216
chr3L	10316126	10316369	PRE_peak_217
chr3L	10318158	10318644	PRE_peak_218
chr3L	10318703	10319034	PRE_peak_219
chr3L	11000661	11001118	PRE_peak_220
chr3L	11001756	11002893	PRE_peak_221
chr3L	11003320	11004225	PRE_peak_222
chr3L	11920351	11920823	PRE_peak_223
chr3L	12321882	12322339	PRE_peak_224
chr3L	12425809	12426061	PRE_peak_225
chr3L	12426847	12427220	PRE_peak_226
chr3L	12427509	12427887	PRE_peak_227
chr3L	12460831	12461542	PRE_peak_228
chr3L	12573193	12573865	PRE_peak_229
chr3L	12573960	12574257	PRE_peak_230
chr3L	12602293	12602942	PRE_peak_231
chr3L	12646284	12646562	PRE_peak_232
chr3L	12683394	12683564	PRE_peak_233
chr3L	12683861	12684206	PRE_peak_234
chr3L	12685689	12686980	PRE_peak_235
chr3L	13394152	13394571	PRE_peak_236
chr3L	13396592	13396949	PRE_peak_237
chr3L	14124379	14125114	PRE_peak_238
chr3L	14126089	14126403	PRE_peak_239
chr3L	14143214	14143662	PRE_peak_240
chr3L	14170509	14171547	PRE_peak_241
chr3L	14572044	14572466	PRE_peak_242
chr3L	14573515	14573859	PRE_peak_243
chr3L	14592603	14593048	PRE_peak_244
chr3L	14593702	14594055	PRE_peak_245
chr3L	15036999	15037370	PRE_peak_246
chr3L	18391251	18391887	PRE_peak_247
chr3L	18393073	18393606	PRE_peak_248
chr3L	18611379	18611531	PRE_peak_249
chr3L	18847465	18847865	PRE_peak_250
chr3L	19656009	19656187	PRE_peak_251
chr3L	19656330	19657141	PRE_peak_252
chr3L	19658198	19658475	PRE_peak_253
chr3L	20613491	20614083	PRE_peak_254
chr3L	20614643	20615613	PRE_peak_255
chr3L	20616307	20616702	PRE_peak_256
chr3L	20616977	20617163	PRE_peak_257
chr3L	20688332	20689078	PRE_peak_258
chr3L	20785821	20786135	PRE_peak_259
chr3L	21451839	21452157	PRE_peak_260
chr3L	21453248	21454044	PRE_peak_261
chr3L	21465039	21465260	PRE_peak_262
chr3L	21469506	21470397	PRE_peak_263
chr3L	21472332	21473351	PRE_peak_264
chr3L	21577750	21578277	PRE_peak_265
chr3L	21591221	21592162	PRE_peak_266
chr3L	21801018	21801463	PRE_peak_267
chr3L	22125844	22126225	PRE_peak_268
chr3L	22717344	22717801	PRE_peak_269
chr3R	166896	167189	PRE_peak_270
chr3R	172178	172750	PRE_peak_271
chr3R	659457	659670	PRE_peak_272
chr3R	661052	661398	PRE_peak_273
chr3R	678098	678674	PRE_peak_274
chr3R	1426235	1426494	PRE_peak_275
chr3R	1542408	1542996	PRE_peak_276
chr3R	2504217	2504537	PRE_peak_277
chr3R	2508953	2509255	PRE_peak_278
chr3R	2567333	2567604	PRE_peak_279
chr3R	2567683	2568054	PRE_peak_280
chr3R	2617169	2617711	PRE_peak_281
chr3R	2636328	2636933	PRE_peak_282
chr3R	2670125	2670397	PRE_peak_283
chr3R	2671344	2671882	PRE_peak_284
chr3R	2674236	2674817	PRE_peak_285
chr3R	2675599	2676006	PRE_peak_286
chr3R	2711174	2711467	PRE_peak_287
chr3R	2712093	2712297	PRE_peak_288
chr3R	2714677	2714842	PRE_peak_289
chr3R	2718785	2719549	PRE_peak_290
chr3R	2729219	2729637	PRE_peak_291
chr3R	2738514	2739009	PRE_peak_292
chr3R	2756151	2756556	PRE_peak_293
chr3R	2758484	2758799	PRE_peak_294
chr3R	2761284	2761585	PRE_peak_295
chr3R	2778869	2779133	PRE_peak_296
chr3R	2782367	2782876	PRE_peak_297
chr3R	2788914	2789135	PRE_peak_298
chr3R	2790795	2791054	PRE_peak_299
chr3R	2792312	2792937	PRE_peak_300
chr3R	2804058	2804404	PRE_peak_301
chr3R	2817331	2817983	PRE_peak_302
chr3R	2820171	2820383	PRE_peak_303
chr3R	2820792	2821140	PRE_peak_304
chr3R	2822561	2823209	PRE_peak_305
chr3R	2824547	2825411	PRE_peak_306
chr3R	2826253	2827102	PRE_peak_307
chr3R	2830161	2830485	PRE_peak_308
chr3R	2857276	2857588	PRE_peak_309
chr3R	2859294	2859608	PRE_peak_310
chr3R	2861635	2861907	PRE_peak_311
chr3R	2862739	2863753	PRE_peak_312
chr3R	3635978	3636223	PRE_peak_313
chr3R	3762525	3762920	PRE_peak_314
chr3R	3788520	3788764	PRE_peak_315
chr3R	3789194	3789461	PRE_peak_316
chr3R	4007040	4007865	PRE_peak_317
chr3R	4013261	4013933	PRE_peak_318
chr3R	4016386	4016988	PRE_peak_319
chr3R	4103470	4103860	PRE_peak_320
chr3R	4159337	4159916	PRE_peak_321
chr3R	4160092	4161049	PRE_peak_322
chr3R	5456434	5456700	PRE_peak_323
chr3R	6194166	6194348	PRE_peak_324
chr3R	6439828	6440642	PRE_peak_325
chr3R	6442353	6443119	PRE_peak_326
chr3R	6447920	6448286	PRE_peak_327
chr3R	6490735	6491028	PRE_peak_328
chr3R	7079532	7079866	PRE_peak_329
chr3R	7086802	7087298	PRE_peak_330
chr3R	7128225	7128493	PRE_peak_331
chr3R	7128590	7129134	PRE_peak_332
chr3R	7129414	7129616	PRE_peak_333
chr3R	7179197	7179552	PRE_peak_334
chr3R	7589328	7589875	PRE_peak_335
chr3R	8070159	8070592	PRE_peak_336
chr3R	8104450	8105247	PRE_peak_337
chr3R	8106349	8106961	PRE_peak_338
chr3R	8889450	8890360	PRE_peak_339
chr3R	8890951	8891273	PRE_peak_340
chr3R	8897747	8898241	PRE_peak_341
chr3R	8900289	8900690	PRE_peak_342
chr3R	9637473	9637815	PRE_peak_343
chr3R	9638293	9638962	PRE_peak_344
chr3R	9700552	9701240	PRE_peak_345
chr3R	9702794	9703234	PRE_peak_346
chr3R	9727147	9727732	PRE_peak_347
chr3R	11814920	11815232	PRE_peak_348
chr3R	11818869	11819222	PRE_peak_349
chr3R	11851373	11852024	PRE_peak_350
chr3R	11863745	11864031	PRE_peak_351
chr3R	12211420	12211705	PRE_peak_352
chr3R	12229011	12229772	PRE_peak_353
chr3R	12236383	12236973	PRE_peak_354
chr3R	12239510	12239853	PRE_peak_355
chr3R	12249043	12249311	PRE_peak_356
chr3R	12487540	12487719	PRE_peak_357
chr3R	12503791	12504201	PRE_peak_358
chr3R	12517176	12517423	PRE_peak_359
chr3R	12528334	12529103	PRE_peak_360
chr3R	12529595	12529926	PRE_peak_361
chr3R	12531187	12531345	PRE_peak_362
chr3R	12541258	12541912	PRE_peak_363
chr3R	12543949	12544944	PRE_peak_364
chr3R	12545508	12546197	PRE_peak_365
chr3R	12559964	12560580	PRE_peak_366
chr3R	12567989	12568356	PRE_peak_367
chr3R	12589174	12590226	PRE_peak_368
chr3R	12597674	12597982	PRE_peak_369
chr3R	12637471	12638012	PRE_peak_370
chr3R	12641386	12641774	PRE_peak_371
chr3R	12651927	12652563	PRE_peak_372
chr3R	12655675	12656158	PRE_peak_373
chr3R	12658725	12659051	PRE_peak_374
chr3R	12660954	12661183	PRE_peak_375
chr3R	12672895	12673244	PRE_peak_376
chr3R	12674295	12674731	PRE_peak_377
chr3R	12681698	12681884	PRE_peak_378
chr3R	12683259	12683845	PRE_peak_379
chr3R	12695029	12695424	PRE_peak_380
chr3R	12702422	12702728	PRE_peak_381
chr3R	12704212	12704553	PRE_peak_382
chr3R	12708269	12708703	PRE_peak_383
chr3R	12712200	12712530	PRE_peak_384
chr3R	12724098	12725819	PRE_peak_385
chr3R	12739220	12739562	PRE_peak_386
chr3R	12744672	12745081	PRE_peak_387
chr3R	12746160	12746459	PRE_peak_388
chr3R	12749183	12749597	PRE_peak_389
chr3R	12759068	12759433	PRE_peak_390
chr3R	12759812	12760778	PRE_peak_391
chr3R	12761958	12762273	PRE_peak_392
chr3R	12774301	12774677	PRE_peak_393
chr3R	12783607	12783785	PRE_peak_394
chr3R	12784144	12784333	PRE_peak_395
chr3R	12785955	12786453	PRE_peak_396
chr3R	12789339	12789589	PRE_peak_397
chr3R	12795256	12795539	PRE_peak_398
chr3R	12795826	12796066	PRE_peak_399
chr3R	13381847	13382376	PRE_peak_400
chr3R	13382853	13383676	PRE_peak_401
chr3R	13384064	13384924	PRE_peak_402
chr3R	13491485	13492046	PRE_peak_403
chr3R	13492189	13492801	PRE_peak_404
chr3R	13888973	13889550	PRE_peak_405
chr3R	13947079	13947896	PRE_peak_406
chr3R	14197183	14197522	PRE_peak_407
chr3R	14749495	14749823	PRE_peak_408
chr3R	15628314	15628495	PRE_peak_409
chr3R	16672470	16672814	PRE_peak_410
chr3R	17204441	17204838	PRE_peak_411
chr3R	17213281	17213614	PRE_peak_412
chr3R	17214337	17214623	PRE_peak_413
chr3R	17259714	17260460	PRE_peak_414
chr3R	17271842	17272541	PRE_peak_415
chr3R	17273579	17273817	PRE_peak_416
chr3R	17285723	17286101	PRE_peak_417
chr3R	17324912	17325676	PRE_peak_418
chr3R	17382714	17383445	PRE_peak_419
chr3R	17383648	17384052	PRE_peak_420
chr3R	17384585	17385039	PRE_peak_421
chr3R	17386648	17387978	PRE_peak_422
chr3R	17389137	17389335	PRE_peak_423
chr3R	18958964	18959122	PRE_peak_424
chr3R	18967464	18968103	PRE_peak_425
chr3R	18969220	18969403	PRE_peak_426
chr3R	19018946	19019536	PRE_peak_427
chr3R	19026738	19027160	PRE_peak_428
chr3R	19036464	19036842	PRE_peak_429
chr3R	19037380	19037682	PRE_peak_430
chr3R	19118692	19119226	PRE_peak_431
chr3R	19121049	19121486	PRE_peak_432
chr3R	20906212	20906538	PRE_peak_433
chr3R	20920303	20920760	PRE_peak_434
chr3R	21924832	21925094	PRE_peak_435
chr3R	22707142	22707446	PRE_peak_436
chr3R	23019609	23020302	PRE_peak_437
chr3R	23266978	23267425	PRE_peak_438
chr3R	24372783	24373339	PRE_peak_439
chr3R	24410806	24411573	PRE_peak_440
chr3R	24412075	24412355	PRE_peak_441
chr3R	25381751	25382261	PRE_peak_442
chr3R	25385862	25386195	PRE_peak_443
chr3R	25397557	25398490	PRE_peak_444
chr3R	25515980	25516270	PRE_peak_445
chr3R	25516549	25517232	PRE_peak_446
chr3R	25517573	25518360	PRE_peak_447
chr3R	26096505	26097520	PRE_peak_448
chr3R	26098499	26099153	PRE_peak_449
chr3R	26099617	26100010	PRE_peak_450
chr3R	26100603	26100838	PRE_peak_451
chr3R	26101728	26102109	PRE_peak_452
chr3R	26102724	26103009	PRE_peak_453
chr3R	26103463	26103805	PRE_peak_454
chr3R	26214273	26214548	PRE_peak_455
chr3R	26441941	26442635	PRE_peak_456
chr3R	26587983	26588332	PRE_peak_457
chr3R	26589752	26590270	PRE_peak_458
chr3R	26591129	26591809	PRE_peak_459
chr3R	26592284	26592569	PRE_peak_460
chr3R	26592639	26593110	PRE_peak_461
chr3R	26598515	26598868	PRE_peak_462
chr3R	26607547	26607942	PRE_peak_463
chr3R	26677509	26678172	PRE_peak_464
chr3R	26734703	26735131	PRE_peak_465
chr3R	26737817	26738648	PRE_peak_466
chr3R	26887145	26887335	PRE_peak_467
chr3R	26888120	26888386	PRE_peak_468
chr3R	27896753	27897469	PRE_peak_469
chr3R	27898328	27898532	PRE_peak_470
chr4	405254	405516	PRE_peak_471
chr4	405854	406317	PRE_peak_472
chr4	414152	414368	PRE_peak_473
chr4	444029	444261	PRE_peak_474
chr4	725055	725245	PRE_peak_475
chr4	827652	828078	PRE_peak_476
chr4	828307	829110	PRE_peak_477
chr4	865112	865427	PRE_peak_478
chr4	1010047	1010446	PRE_peak_479
chr4	1109170	1109457	PRE_peak_480
chr4	1118326	1118539	PRE_peak_481
chr4	1118745	1118997	PRE_peak_482
chrX	481867	482053	PRE_peak_483
chrX	482959	483319	PRE_peak_484
chrX	484269	485137	PRE_peak_485
chrX	2017159	2018091	PRE_peak_486
chrX	2018312	2018833	PRE_peak_487
chrX	2019523	2019966	PRE_peak_488
chrX	2029520	2029859	PRE_peak_489
chrX	2030363	2030548	PRE_peak_490
chrX	2030700	2031320	PRE_peak_491
chrX	2031488	2031855	PRE_peak_492
chrX	2032005	2032833	PRE_peak_493
chrX	2034642	2034875	PRE_peak_494
chrX	2035246	2035807	PRE_peak_495
chrX	2035876	2036062	PRE_peak_496
chrX	2322623	2323311	PRE_peak_497
chrX	2329045	2329237	PRE_peak_498
chrX	4305258	4305881	PRE_peak_499
chrX	4306544	4306985	PRE_peak_500
chrX	4314184	4314583	PRE_peak_501
chrX	4315931	4316637	PRE_peak_502
chrX	4317737	4318538	PRE_peak_503
chrX	4318845	4319579	PRE_peak_504
chrX	4320628	4321328	PRE_peak_505
chrX	4339006	4339176	PRE_peak_506
chrX	4401237	4401494	PRE_peak_507
chrX	4402029	4402724	PRE_peak_508
chrX	4448877	4449035	PRE_peak_509
chrX	4483339	4483551	PRE_peak_510
chrX	4483747	4484632	PRE_peak_511
chrX	4490161	4491247	PRE_peak_512
chrX	4510026	4510184	PRE_peak_513
chrX	4510572	4510966	PRE_peak_514
chrX	4511223	4511729	PRE_peak_515
chrX	5454580	5455114	PRE_peak_516
chrX	5455659	5456065	PRE_peak_517
chrX	5473438	5473923	PRE_peak_518
chrX	5487873	5488217	PRE_peak_519
chrX	5892089	5892264	PRE_peak_520
chrX	5894750	5895042	PRE_peak_521
chrX	5895214	5895780	PRE_peak_522
chrX	5907062	5907811	PRE_peak_523
chrX	6493264	6493449	PRE_peak_524
chrX	7004867	7005322	PRE_peak_525
chrX	7011642	7012030	PRE_peak_526
chrX	7124753	7124966	PRE_peak_527
chrX	7146568	7146748	PRE_peak_528
chrX	7262489	7262730	PRE_peak_529
chrX	7498420	7499006	PRE_peak_530
chrX	7502001	7502699	PRE_peak_531
chrX	7519579	7519757	PRE_peak_532
chrX	7520665	7521731	PRE_peak_533
chrX	7522388	7522914	PRE_peak_534
chrX	7523219	7523820	PRE_peak_535
chrX	7523968	7524296	PRE_peak_536
chrX	7954937	7955219	PRE_peak_537
chrX	8518852	8519264	PRE_peak_538
chrX	8530425	8530644	PRE_peak_539
chrX	8534799	8535180	PRE_peak_540
chrX	8544497	8545260	PRE_peak_541
chrX	8545457	8545681	PRE_peak_542
chrX	8551133	8551429	PRE_peak_543
chrX	8568745	8569234	PRE_peak_544
chrX	8570776	8571088	PRE_peak_545
chrX	8651804	8652232	PRE_peak_546
chrX	8699207	8699460	PRE_peak_547
chrX	8699689	8699875	PRE_peak_548
chrX	8699960	8700173	PRE_peak_549
chrX	8700546	8701116	PRE_peak_550
chrX	8701417	8701671	PRE_peak_551
chrX	9178027	9178685	PRE_peak_552
chrX	9586667	9587066	PRE_peak_553
chrX	9587688	9588361	PRE_peak_554
chrX	9616071	9616348	PRE_peak_555
chrX	9623009	9623379	PRE_peak_556
chrX	9623434	9623617	PRE_peak_557
chrX	9638251	9638629	PRE_peak_558
chrX	9643609	9644290	PRE_peak_559
chrX	9659674	9659884	PRE_peak_560
chrX	10716720	10717086	PRE_peak_561
chrX	12509805	12510122	PRE_peak_562
chrX	12515677	12516009	PRE_peak_563
chrX	12819465	12819869	PRE_peak_564
chrX	12820143	12820523	PRE_peak_565
chrX	12832147	12832664	PRE_peak_566
chrX	13888698	13889551	PRE_peak_567
chrX	13889973	13890162	PRE_peak_568
chrX	13931682	13932599	PRE_peak_569
chrX	16040863	16041181	PRE_peak_570
chrX	16041465	16042570	PRE_peak_571
chrX	16042895	16043531	PRE_peak_572
chrX	16044349	16045085	PRE_peak_573
chrX	16110479	16111169	PRE_peak_574
chrX	16111219	16112074	PRE_peak_575
chrX	16115197	16115442	PRE_peak_576
chrX	16125360	16125661	PRE_peak_577
chrX	16130252	16130724	PRE_peak_578
chrX	17207366	17207735	PRE_peak_579
chrX	17208253	17208634	PRE_peak_580
chrX	17239788	17240395	PRE_peak_581
chrX	17262605	17263026	PRE_peak_582
chrX	17291087	17291453	PRE_peak_583
chrX	17659031	17659299	PRE_peak_584
chrX	17662001	17662806	PRE_peak_585
chrX	17683000	17684554	PRE_peak_586
chrX	17693801	17694003	PRE_peak_587
chrX	17696421	17696671	PRE_peak_588
chrX	17698035	17698267	PRE_peak_589
chrX	18137919	18138221	PRE_peak_590
chrX	18203044	18203336	PRE_peak_591
chrX	18203383	18203950	PRE_peak_592
chrX	18204521	18205186	PRE_peak_593
chrX	18205252	18205685	PRE_peak_594
chrX	18206468	18207011	PRE_peak_595
chrX	18481326	18481661	PRE_peak_596
chrX	19439918	19441092	PRE_peak_597
chrX	19442484	19442989	PRE_peak_598
chrX	20453898	20454297	PRE_peak_599
chrX	20561470	20561867	PRE_peak_600
chrX	20564789	20565615	PRE_peak_601
chrX	21244929	21245391	PRE_peak_602
