# Supplementary material for: Drosophila poised enhancers are generated during tissue patterning with the help of repression
Source: HighWire-hosted journal article supplement (doi:10.1101/gr.209486.116), 2016-11-14
Supplement: Supplemental_Table_S3.xlsx [file Supplemental_Table_S3.xlsx]

## Sheet: Sheet1
sample_name	total_reads	aligned_reads	library_prep_kit	barcode_kit	number_macs2_peaks	peak_calling_notes
gd7_h3k27ac_1	39221792	30206440	NEBNext DNA	Illumina Paired End	11760
gd7_h3k27ac_2	24558754	18977868	NEBNext ChIP	NEBNext Multiplex	8244
gd7_h3k27me3_1	28099620	21717696	NEBNext ChIP	NEBNext Multiplex	5964	Broad peak calling via "--broad"
gd7_h3k27me3_2	24535827	19255540	NEBNext ChIP	NEBNext Multiplex	3992	Broad peak calling via "--broad"
gd7_h3k4me1_1	38812846	29369154	NEBNext DNA	Illumina Paired End	27200
gd7_h3k4me1_2	36758378	28373838	NEBNext ChIP	NEBNext Multiplex	23321
gd7_mad_1	27211560	19375328	NEBNext ChIP	NEBNext Multiplex	11611
gd7_mad_2	19412495	14089909	NEBNext ChIP	NEBNext Multiplex	15065
gd7_wce_1	16658678	11534081	NEBNext DNA	home-made
gd7_wce_2	9777089	6565226	NEBNext DNA	home-made
gd7_wce_4	44852378	31400121	NEBNext ChIP	NEBNext Multiplex
gd7_zen_1	12469890	9233581	NEBNext ChIP	NEBNext Multiplex	17282
gd7_zen_2	23414513	16561926	NEBNext ChIP	NEBNext Multiplex	19375
gd7_zld_1	37212522	29493975	NEBNext ChIP	NEBNext Multiplex	13779
gd7_zld_2	19258549	14928138	NEBNext ChIP	NEBNext Multiplex	17253
orer_GAGA_1	42692613	32144942	NEBNext ChIP	NEBNext Multiplex	9451
orer_Pc_1	31179457	14092522	NEBNext DNA	home-made	10075
orer_wce_1	27744920	20544059	NEBNext ChIP	NEBNext Multiplex
rnaseq_gd7_1	14681232	10923723	TruSeq	TruSeq
rnaseq_gd7_2	21519571	16769731	TruSeq	TruSeq
rnaseq_gd7_3	25741902	19948662	TruSeq	TruSeq
rnaseq_toll10b_1	27571253	26868746	TruSeq	TruSeq
rnaseq_toll10b_2	23256183	22659564	TruSeq	TruSeq
tl10b_dl_1	11280670	7590716	NEBNext DNA	Illumina Paired End	15744
tl10b_dl_2	18955656	11919244	NEBNext ChIP	NEBNext Multiplex	1253	Extra parameters "--nomodel --extsize 107" used due to lower ChIP quality
tl10b_h3k27ac_1	5928589	3242843	NEBNext DNA	home-made	8825
tl10b_h3k27ac_3	22074064	16782519	NEBNext ChIP	NEBNext Multiplex	10737
tl10b_h3k27ac_4	21806275	15909717	NEBNext ChIP	NEBNext Multiplex	8281
tl10b_h3k27me3_1	32069449	24160936	NEBNext ChIP	NEBNext Multiplex	4613	Broad peak calling via "--broad"
tl10b_h3k27me3_2	30131820	21772204	NEBNext ChIP	NEBNext Multiplex	9608	Broad peak calling via "--broad"
tl10b_h3k4me1_1	13165326	9522146	Magna ChIP-Seq	NEXTflex	32781
tl10b_h3k4me1_3	18324819	13295951	NEBNext ChIP	NEBNext Multiplex	15347
tl10b_twi_1	24170982	16105244	NEBNext ChIP	NEBNext Multiplex	18837
tl10b_twi_2	23833167	17790978	NEBNext ChIP	NEBNext Multiplex	12869
tl10b_wce_2	16964545	12073545	Magna ChIP-Seq	NEXTflex
tl10b_wce_3	3186803	2052742	NEBNext DNA	home-made
tl10b_wce_4	6380089	4014640	NEBNext DNA	home-made
tl10b_wce_5	52070511	31491032	NEBNext ChIP	NEBNext Multiplex
Reagents details:
NEXTflex ChIP-Seq Barcodes	Bioo Scientific, #514123
NEBNext DNA Library Prep Master Mix Set for Illumina	NEB, #E6040L
NEBNext ChIP-Seq Library Prep Master Mix Set for Illumina®	NEB, #E6240L
TruSeq DNA Sample Prep Kit and barcodes	Illumina, #FC-121-1001, #FC-121-1002
Magna ChIP-Seq ChIP and NGS Library Preparation Kit	Millipore, #17-1010
Illumina Paired End Primers for ChIP-Seq	Illumina, #PE-102-1003
NEBNext Multiplex Oligos for Illumina (Index Primers Set 1 and 2)	NEB, # E7335S and #E7500S
